# Supplementary material for: Potassium–thiacalix[8]arene assembly: structure and guest sorption profiles
Source: Royal Society of Chemistry journal article supplement (doi:10.1039/b413373k), 2004-12-23

## Potassium- Thiocalix [8] arene Assembly: Structure and Guest Sorption Profiles

Yoshihiko Kondo, Ken Endo, Nobuaki Ogawa and Fumio Hamada\*

[\*] Department of Material-Process Engineering and Applied Chemistry for Environments, Faculty of Engineering and Resource Science, Akita University, Tegata, Akita 010-8502, Japan

Fax: (+81) 18-837-0404

E-mail: hamada@ipc.akita-u.ac.jp

### Experimental Section for General Procedures

**Figure I** Binding isotherms for N<sub>2</sub> at 77 K with apohost as [K<sub>4</sub>(**3•4H**)] 8MeOH.

## General Procedure

<sup>1</sup>H NMR spectra were taken on Bruker DPX 300 or Varian Mercury 300 spectrometer. IR spectra were obtained with a Perkin-Elmer SPECTRUM 2000 spectrophotometer. Microanalyses were performed at the microanalysis center Tohoku University.

X-ray powder diffractions were obtained with Rigaku RAD-PC X-ray diffractometer (30 kV, 20 mA, Cu-K $\alpha$  radiation with  $\lambda = 1.5418 \text{ \AA}$ ).

The binding isotherms were obtained with a BELSORP 18 automated gas adsorption apparatus. In the sample chamber (ca. 15 mL) maintained at  $25.0 \pm 0.1 \text{ }^\circ\text{C}$  was placed apohost as  $[\text{K}_4(\mathbf{3}\cdot\mathbf{4H})]$  8MeOH complex (ca. 100 mg), which has been pretreated at  $60 \text{ }^\circ\text{C}$  at  $< 10^{-3}$  Torr for 18 hr just prior to use. The larger gas chamber (176.36 mL) with a pressure gauge was kept at  $50 \pm 0.1 \text{ }^\circ\text{C}$ . Helium gas at certain pressure was introduced in the gas chamber and was allowed to diffuse into the sample chamber by opening a valve. The change in pressure allowed an accurate determination of volume of the total gas phase. Host-guest complexation was monitored in a similar manner by using a guest vapor in place of He. The amount of guest adsorbed was calculated readily from the pressure difference ( $P_{\text{cal}} - P_e$ ), where,  $P_{\text{cal}}$  is the calculated pressure if there were no guest adsorption, as in the case of helium, and  $P_e$  is the observed equilibrium pressure, as which the change in pressure in 600 sec had become smaller than 1 % of the pressure at the point. All operations were computer-controlled and automatic.

The specific surface areas ( $A_{\text{BET}}$ ) were obtained by using the same apparatus. The adsorption isotherm for N<sub>2</sub> at 77 K (Figure I of Supporting Information) cannot fit well with BET equation,  $P_e/V(P_e - P_s) = 1/V_m C + [(C - 1)/V_m C](P_e/P_s)$ , where  $P_s$  is saturation vapor pressure of N<sub>2</sub> at 77 K and is 760 Torr,  $V$  (mL/g) is the amount (in terms of volume in the standard state) of N<sub>2</sub>, adsorbed per gram of adsorbent,  $V_m$  is that for saturation monolayer coverage, and  $C$  is a constant.

Figure I (Supporting information)

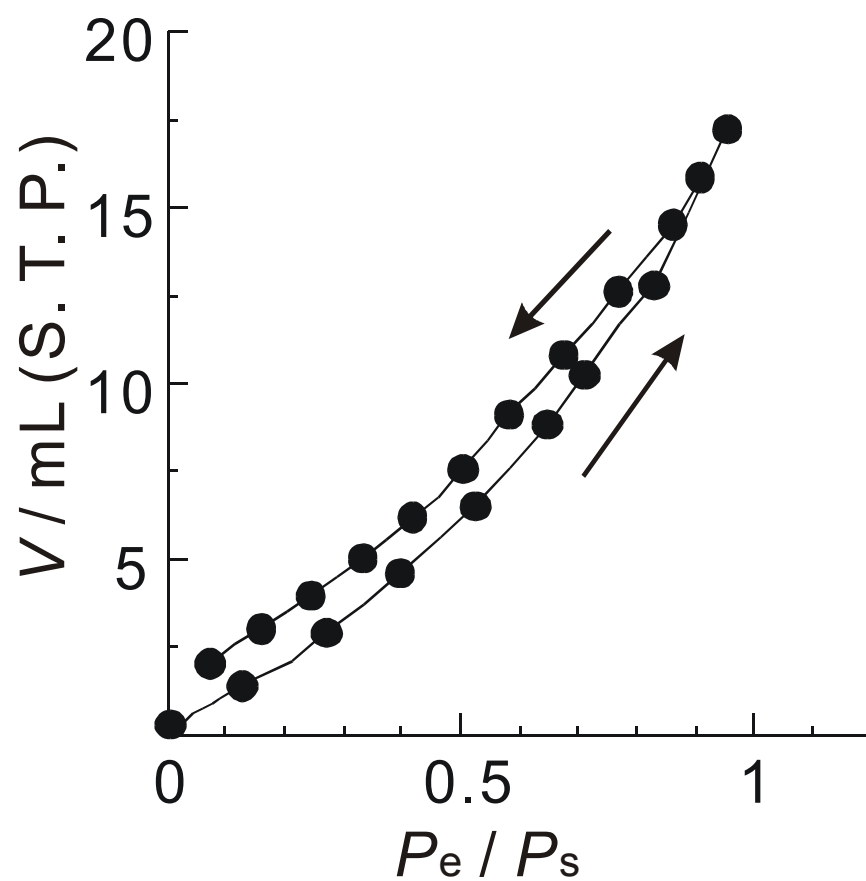

Supplement: b413373k.pdf [file b413373k.pdf]
